# Supplementary material for: Remote Skin Cancer Diagnosis: Adding Images to Electronic Referrals Is More Efficient Than Wait-Listing for a Nurse-Led Imaging Clinic
Source: MDPI journal article supplement (doi:10.3390/cancers13225828), 2021-11-20
Supplement: s1 [file s1]

# Supplementary Materials: Remote Skin Cancer Diagnosis: Adding Images to Electronic Referrals Is More Efficient than Wait-Listing for a Nurse-Led Imaging Clinic

Leah Jones, Michael Jameson, and Amanda Oakley

**Table S1.** Patient demographics of incidental lesions during specialist follow-up

| Variable             | Matched SSC<br><i>n</i> = 41 | 2020 VLC<br><i>n</i> = 24 | <i>p</i> -Value | 2016 VLC<br><i>n</i> = 91 | <i>p</i> -Value |
|----------------------|------------------------------|---------------------------|-----------------|---------------------------|-----------------|
| Mean age (SD)        | 63 yrs (15.1)                | 62 yrs (15.9)             | 0.96            | 67 yrs (14.4)             | 0.26            |
|                      |                              | Gender: N (%)             |                 |                           |                 |
| Female               | 26 (59)                      | 14 (58)                   |                 | 52 (57)                   |                 |
| Male                 | 18 (41)                      | 10 (42)                   |                 | 39 (43)                   |                 |
|                      |                              |                           | <0.001          |                           | 0.83            |
|                      |                              | Ethnicity: N (%)          |                 |                           |                 |
| New Zealand European | 40 (91)                      | 20 (83)                   |                 | 80 (88)                   |                 |
| Maori                | 0 (0)                        | 0 (0)                     |                 | 2 (2)                     |                 |
| Pacific              | 1 (2)                        | 0 (0)                     |                 | 0 (0)                     |                 |
| Other European       | 2 (5)                        | 2 (8)                     |                 | 8 (9)                     |                 |
| Asian                | 1 (2)                        | 0 (0)                     |                 | 1 (1)                     |                 |
| Other                | 0 (0)                        | 2 (8)                     |                 | 0 (0)                     |                 |
|                      |                              |                           | 0.26            |                           | 0.40            |

SSC—suspected skin cancer pathway; VLC—virtual lesion clinic; SD—standard deviation.

**Table S2.** Incidental lesions during specialist follow-up

| Variable                                          | Matched SSC<br><i>n</i> = 41                  | 2020 VLC<br><i>n</i> = 24 | <i>p</i> -Value | 2016 VLC<br><i>n</i> = 91 | <i>p</i> -Value |
|---------------------------------------------------|-----------------------------------------------|---------------------------|-----------------|---------------------------|-----------------|
| Total number (%) of incidental lesions identified | 11 (27)                                       | 2 (8)                     |                 | 22 (24)                   |                 |
| Mean (SD) incidental lesions per patient          | 0.2 (0.6)                                     | 0.0 (0.3)                 | 0.64            | 0.2 (0.7)                 | 0.95            |
|                                                   | <b>Specialist specific diagnosis</b>          |                           |                 |                           |                 |
| Actinic keratosis                                 | 1 (1)                                         | 0 (0)                     |                 | 3 (14)                    |                 |
| SCC                                               | 1 (1)                                         | 0 (0)                     |                 | 3 (14)                    |                 |
| BCC                                               | 4 (36)                                        | 1 (50)                    |                 | 14 (64)                   |                 |
| Uncertain                                         | 5 (45)                                        | 1 (50)                    |                 | 2 (9)                     |                 |
|                                                   |                                               |                           | 0.93            |                           | 0.09            |
| Lesions with histology available                  | 4                                             | 2                         |                 | 16                        |                 |
|                                                   | <b>Benign/malignant lesion classification</b> |                           |                 |                           |                 |
| Benign                                            | 1 (1)                                         | 1 (50)                    |                 | 7 (42)                    |                 |
| Pre-malignant                                     | 2 (18)                                        | 0 (0)                     |                 | 3 (19)                    |                 |
| Malignant                                         | 8 (73)                                        | 1 (50)                    |                 | 6 (38)                    |                 |
|                                                   |                                               |                           | 0.18            |                           | 0.12            |
| BMR                                               | 0.1                                           | 1                         |                 | 1.2                       |                 |
| Keratinocytic:melanocytic                         | 3.0                                           | 1.0                       |                 | 1.0                       |                 |
| MIS:melanoma                                      | 2                                             | 0                         |                 | 0                         |                 |

SSC—suspected skin cancer pathway; VLC—virtual lesion clinic; SD—standard deviation; yr—years; BMR—benign to malignant ratio; MIS—melanoma-in-situ.

**Table S3.** Incidental lesions during VLC

| Variable                                      | 2020 VLC<br><i>n</i> = 108 (%) | 2016 VLC<br><i>n</i> = 400 (%) |
|-----------------------------------------------|--------------------------------|--------------------------------|
| Total number of additional lesions identified | 29 (27)                        | 78 (20)                        |
| Lesions with histology available              | 4                              | 26                             |
| Benign/malignant lesion classification        |                                |                                |
| Benign                                        | 0 (0)                          | 4 (15)                         |

---

|                           |         |         |
|---------------------------|---------|---------|
| Pre-malignant             | 0 (0)   | 3 (12)  |
| Malignant                 | 4 (100) | 19 (73) |
| Benign:malignant          | 0.0     | 0.2     |
| Keratinocytic:melanocytic | 0.3     | 5.3     |
| MIS:melanoma              | 0.5     | 2.0     |

---

VLC—virtual lesion clinic; yr—years; MIS—melanoma-in-situ

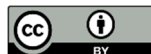

**Copyright:** © 2021 by the authors. Licensee MDPI, Basel, Switzerland. This article is an open access article distributed under the terms and conditions of the Creative Commons Attribution (CC BY) license (<https://creativecommons.org/licenses/by/4.0/>).
